# Supplementary material for: The utility of compound muscle action potential and creatinine in childhood spinal muscle atrophy
Source: Research Square preprint supplement (doi:10.21203/rs.3.rs-6686700/v1), 2025-06-17
Supplement: Supplementary file 1 [file fa7d468ad6c85ac6da359cb2.xlsx]

## Sheet: Sheet1
	HFMSE	RULM	CHOP	性别		出生日期		Onset Age	治疗时月龄	SMN1突变	SMN2 copy number	SMA分型	开始打鞘	检查时间	开始检查时间		腓总神经		胫神经		股神经		正中	尺	肌酐
					性别		基线运动里程碑										左	右	左	右	左	右	左/右	左/右
1	19			男	1	2021-01-09	独坐	8	13	deletion	3	2	2022-02-09	2021-11-26	10		3.2	3	2.3	2.7	0.22	0	5.8	4	13.5
2	18			男	1	2021-05-26	独坐	8	11	deletion	3	2	2022-04-28	2022-04-29	11		1.6	0.67	1.41	3.8	0	0	4.2	1.38	14.9
3			12	男	1	2022-07-04	不能独坐	6	7			1	2023-02-12	2023-02-10	7	基线	0	0	0.17	0	0	0	0.055	0
4			43	女	2	45164	不能独坐	1		deletion	2	1	口服药物	2023-10-07	2	基线	0.49				0		0.11	0
5	30			男	1	2022-08-24	独坐	9	15	deletion	3	2	2023-12-06	2023-11-13	15	基线	2.9	3	10.3	7.4	1.29	0.23	4		18.9
6	12			男	1	2022-07-03	独坐	8	17	deletion		2	2023-12-18	2023-12-18	17	基线	1.92	3.6	0.97	0.18	0	0	1.39	0.48	12.3
7	38			男	1	40209	独走	36	168	deletion		3	2024-02-28	2024-02-29	168	基线	2.8	3.6	3.1	5.1	0	1.52	15.5	3.4
8	1			女	2	2012年	不能独坐	8		deletion		2	未治疗	2024-03-23	144	基础	1.35	2.4	2.3	1.4	0	0.046	2	0.36
9			2	女	2	2024-02-14	不能独坐	2		deletion	2	1	未治疗	2024-04-21	2	基础	0.14	0	0	0.1	0.18	0	0	0.35
10			28	女	2	45154	不能独坐	6	13	deletion		1	2024-06-20	2024-06-20	13	基础	0	0	0.16	0	0	0	0.039	0	16.4
11			7	男	1	45444	不能独坐	1		deletion		1	口服药物	2024-07-27	1	基线	0	0	0.18	0.13	0	0	0.067	0.055
12	64	37		男	1	42978	独走	36	83	deletion		3	2024-08-14	2024-07-17	82	基线	3.5	2.7	23	27.2	4.1	6.7	8.4	11.6	38.2
13			13	女	2	45379	不能独坐	1	4	deletion		1	2024-08-12	2024-08-12	4	基线	0.35	0.069	0.8	0.81	0.084	0.14	0	0.22
14	3	5		女	2	2011-10-14	不能独坐	3	125	deletion	3	1	2022-04-08	2022-03-23	125	1	0	0	0.35	0	0	0	2.7	0.16	6.3
15	45	37		男	1	2009-12-09	独走	60	150	deletion		3	2022-07-07	2022-07-08	150	1	11.5	11.1	8.2	12.7	1.72	0.33	15.9	10	30.7
16	19	12		男	1	2012-01-06	独坐	10	121	deletion	3	2	2022-02-28	2022-02-26	121	基线	1.96	3.6	6.3	3.6	0	0	3.9	4.2	29.5
17	12	19		男	1	2017-06-13	独坐	8	56	point mutation	2	2	2022-02-27	2022-02-25	56	基线	1.56	0.97	5	3.1	0	0	2.2	0.3	8.4
18	54	37		男	1	2018-08-30	独走	24	40	deletion	4	3	2022-01-03	2021-09-19	36	基线	6.9	5.3	16.1	9.3	3.4	2.1			24
19	45	37		男	1	2011-10-20	独走	18	123	deletion	4	3	2022-02-08	2022-02-07	123	基线	2.3	3.7	5.4	5.2	1.13	0.91	7.5	7.3	21.2
20	1			男	1	2019-02-23	不能独坐	6	36	deletion	3	2	2022-03-09	2022-03-09	36	基线	2.5	3.8	0.37	0.68	0	0	1.84	0.1	8.3
21	18	27		男	1	2015-03-04	独坐	6	83	deletion	3	2	2022-02-22	2022-02-01	83	基线	5	10	2.6	7.6	0.59	0.13	5.7	1.99	12.4
22			4	男	1	2023-03-28	不能独坐	1	3	deletion	2	1	2023-07-08	2023-07-08	3		0.31		0.26					0.45	13.7
23			18	女	2	2022-06-21	不能独坐	5	6	deletion	3	1	2023-01-03	2023-01-06	6	基线	1.76	2.4	0.84	0.82	0	0	0.36	0.34	18.2
24	30	21		女	2	2019-09-13	独坐	10	32	deletion	4	2	2022-05-16	2022-05-14	32	基线	2.7		0.32	1.55	0.44	0.96	1.68	2.8	14.3
25	20	19		女	2	2016-05-20	独坐	11	71	deletion		2	2022-05-19	2022-05-19	71	基线	1.99	2.3	0.064	1.02	0.64	0.22	3.8	0.29	15
26	17	9		男	1	2007-11-19	独坐	12	171	deletion	3	3	2022-02-08	2022-02-07	171	基线	0.83	0	5.1	8.9	0.24		11.9	5.6	12.8
27	16	26		男	1	2015-02-28	独坐	18	88	deletion		3	2022-07-13	2022-07-10	88	基线	1.4	1.57	2.2	3.1	0	0	3	1.43	13.9
28	47	36		男	1	2011-02-17	独走	12	137	deletion		3	2022-08-01	2022-07-06	137	基线	4.9	5.2	7.2	6.5	0.28	0.35	12.8	6.4	22.9
29	23	25		男	1	2013-11-20	独坐	15	100	deletion		3	2022-04-15	2022-04-14	100	基线	5.9	6.2	2.5	3	0.94	0.5	6.6	3.7	13.4
30	4	10		女	2	2019-08-19	独坐	11	33	deletion	3	2	2022-06-09	2022-06-09	33	基线	0.15	0	0.12	0	0	0	5	1.66	10.1
31	39	27		女	2	2013-07-18	独坐	15	102	deletion		3	2022-02-09	2022-02-07	102	基线	1.13	1.58	3.7	3.6	2.8	1.75	5.3	3.8	12.7
32			14	男	1	2023-06-10	不能独坐	1	3	deletion	2	1	2023-10-05	2023-08-31	3	基线	0.82	0.29	0.031	0.57	0	0	0.75	0	13.3
33	6			男	1	2022-03-08	独坐	10	13	deletion	3	2	2023-04-29	2023-03-18	12	基线	0.54	0.94	0.11	0.72	0.28	0.56	1.61	0.29	16.5
34	6			男	1	2022-03-08	独坐	10	13	deletion	3	2	2023-04-29	2023-04-30	13	基线	0.48	1.29	1.1	0.57	0	0	1.07	0.6	16.5
35	2			女	2	20150615	不能独坐	7	102	点突变		2	2024-01-12	2024-01-10	102	基线	4.1	0.95	0.21	0.085	0	0.09	6.4	0.29	16
36	5	12		女	2	2016-05-28	独坐	8	69	deletion		2	2022-03-03	2022-03-02	69	基线	1.83	1.7	5.3	2.6	0	0	5.8	0.092	5.4
37	30			女	2	41466	独坐	12	137	deletion		2	2025-01-02	2024-10-21	137	基线	2.6	4.5	1.25	3.1	0.49	1.3	7.3	2.8	27.9
38			1	女	2	2024-07-01	不能独坐	1				1	未治疗	2024-10-22	3	基线	0	0.34	0.12	0.16	0	0	0.27	0
39	14			女	2	42557	独坐	12	99	deletion	3	2	2024-10-30	2024-10-31	99	基线	5.2	3.3	2.6	2.3	0.56	0.047	3.2	0.5	18
40	7			女	2	45035	独坐	7	19	deletion	3	2	2024-12-08	2024-09-02	17	基线	1.71	1.8	2.2	1.07	0.48	0.48	3.4	4.6	23.4

## Sheet: Sheet2
	HFMSE	RULM	CHOP	随访肌酐	随访年龄	性别	出生日期	随访运动里程碑	SMN1突变	SMN2 copy number	SMA分型		腓总神经		胫神经		股神经		正中	尺
												针次	左	右	左	右	左	右	左/右	左/右
1	50			32.1	45	男	2021-01-09	独走	deletion	3	2	12
2	28			20.3	44	男	2021-05-26	独走	deletion	3	2	12
3						男	2022-07-04				1
4						女	45164		deletion	2	1
5						男	2022-08-24		deletion	3	2
6	24			16	30	男	2022-07-03	独坐	deletion	SMN1 基因半合子变异和Lossl杂合缺失变异	2	7	1.25	1.01	1.16	1.64	0.13	0.16	1.71	1.06
7						男	40209		deletion		3
8						女	2012年		deletion		2
9						女	2024-02-14		deletion	2	1
10						女	45154		deletion		1
11						男	45444		deletion		1
12						男	42978		deletion		3
13						女	45379		deletion		1
14	4			10.3	143	女	2011-10-14	独坐	deletion	3	1	8	0.085		0		0.021		2.1	0.31
15	59	37		46	180	男	2009-12-09	独走	deletion		3	11	11.9	9.3	15.8	14.7	0	0	16.3	7.9
16	27	26		33.3	155	男	2012-01-06	独坐	deletion	3	2	12	2	3.8	13.2	11.3	0.16	0	6.2	6.1
17	18			15.8	90	男	2017-06-13	独坐	point mutation	2	2	12
18	66	37		26	64	男	2018-08-30	独走	deletion	4	3	10	6.7		19.1		4.1		8.7	7.5
19	55	37		22.8	153	男	2011-10-20	独走	deletion	4	3	11	3.7	5.3	4.2	4.5	2.3	2	8.4	8.2
20	7			22.2	54	男	2019-02-23	独坐	deletion	3	2	8	4.2	3.8	0.55	0.43	0.74	0.39	3.6	0.17
21	23	37		23	117	男	2015-03-04	独坐	deletion	3	2	12	1.09	2.1	3.7	4.1	0	0.35	7.9	3.7
22			57	15.9	17	男	2023-03-28	独坐	deletion	2	1	7	0.79	0.68	1.66	1.39	2.3	1.67	2	1.07
23			62	22.6	28	女	2022-06-21	独坐	deletion	3	1	9	3.5		7.2		1.24		6.8	1.05
24	50	34		23.6	61	女	2019-09-13	独走	deletion	4	2	11	4.1	4.2	5.4	4	1.3	2	2.9	4.2
25	11	28		30.4	98	女	2016-05-20	独坐	deletion		2	10
26	18	27		18.4	205	男	2007-11-19	独坐	deletion	3	3	12	1.95	0.56	7.7	8.5	0.15	0	11.9	7
27	30			11.6	105	男	2015-02-28	独坐	deletion		3	8	3.79	5.79	1.77	4.76	0.31	0.17	13.7	1.38
28	50	37		36.7	163	男	2011-02-17	独走	deletion		3	10	7.7	9.4	8.1	7	1.39	2.5	10.9	8.6
29	37	37		26	131	男	2013-11-20	独坐	deletion		3	11	6.1	5.8	6	2.2	0.92	0.9	6.7	3.1
30	19	33		13.4	59	女	2019-08-19	独坐	deletion	3	2	10	0.65	0.67	0.86	2.4	0.085	0.04	10.8	2.8
31	40	30		14.1	132	女	2013-07-18	独坐	deletion		3	11	2.9	2.1	2.9	3.2	1.47	1.02	4.8	4.4
32			64	28	17	男	2023-06-10	独坐	deletion	2	1	7	0.76	1.17	1.48	1.97	0.61	0.89	2.3	0.75
33	29			18.7	31	男	2022-03-08	独坐	deletion	3	2	8	0.73	0.46	0.54	0.69	0.12	0.71	2.6	0.65
34	29			19.3	31	男	2022-03-08	独坐	deletion	3	2	8	1.3	1.11	1.46	1.39	0.48	1.06	2.2	0.86
35	2			13.7	108	女	20150615	不能独坐	点突变	c.22dupA 的突变	2	5	1.98	1.01	0.26	0.4	0	0.092	5.8	0.61
36	16	23		12	100	女	2016-05-28	独坐	deletion		2	11	3.8	3.8	5.7	5.7	0.1	0	6.7	1.19
37						女	41466		deletion		2
38						女	2024-07-01				1
39						女	42557		deletion	3	2
40						女	45035		deletion	3	1
